# Supplementary material for: Protective Role of Polyphenols in Heart Failure: Molecular Targets and Cellular Mechanisms Underlying Their Therapeutic Potential
Source: PubMed Central journal article supplement (PMC7914665; doi:10.3390/ijms22041668), 2021-02-07
Supplement: ijms-22-01668-s001.pdf [file ijms-22-01668-s001.pdf]

**Table S1.** Effects of Polyphenols in *in vitro* models of HF.

| Polyphenol(s)                                                                                                        | Cells                         | Dosage                                     | Duration                                                 | Insult                                            | Findings                                                                                                                              | Author                |
|----------------------------------------------------------------------------------------------------------------------|-------------------------------|--------------------------------------------|----------------------------------------------------------|---------------------------------------------------|---------------------------------------------------------------------------------------------------------------------------------------|-----------------------|
| Luteolin                                                                                                             | Rat cardiomyocytes            | 16 $\mu\text{mol/L}$                       | 18 h                                                     | Isolated from rats with established HF            | $\uparrow$ SERCA2a, Akt improved contractility and $\text{Ca}^{2+}$ handling.                                                         | Hu et al. [89]        |
| Naringenin                                                                                                           | H9c2 cardiomyocytes           | 80 $\mu\text{mol/L}$                       | 6 h pretreatment                                         | Ischemia-reperfusion                              | $\downarrow$ apoptosis, cleaved caspase-3, $\text{O}_2^-$ , lipid peroxidation, Nox subunit, $\uparrow$ catalase, SOD2                | Yu et al. [78]        |
| Luteolin                                                                                                             | Rat cardiomyocytes            | 2, 4, 8 or 16 $\mu\text{mol/L}$            | 12 h pretreatment                                        | Ischemia-reperfusion                              | $\downarrow$ Bax, apoptosis $\uparrow$ Bcl-2, Akt, SERCA2a improved contractility                                                     | Fang et al. [88]      |
| Lingonberry polyphenol fractions containing: cyanidin-3-galactoside, cyanidin-3-glucoside and cyanidin-3-arabinoside | H9c2 cardiomyocytes           | 1:100, 1:500, 1:1000, and 1:2000 dilutions | 24 h pretreatment                                        | Ischemia-reperfusion                              | $\downarrow$ cleaved caspase-3, apoptosis, JNK                                                                                        | Isaak et al. [93]     |
| Urolithin B                                                                                                          | H9c2 cardiomyocytes           | 20 $\mu\text{M}$                           | 12 h pretreatment                                        | Ischemia-reperfusion                              | $\downarrow$ cleaved caspase-3, apoptosis $\uparrow$ Akt, mTOR, ULK1, Nrf2, HO-1, NQO1, GST1                                          | Zheng et al. [106]    |
| Urolithin A                                                                                                          | Neonatal rat cardiac myocytes | 10 $\mu\text{M}$                           | 24 h and 1h pretreatment                                 | Ischemia-reperfusion                              | $\downarrow$ apoptosis, $\text{O}_2^-$ , lipid peroxidation, Bax, cleaved caspase-3 $\uparrow$ SOD, PI3K, Akt, Bcl-2                  | Tang et al. [172]     |
| Kaempferol                                                                                                           | Rat cardiomyocytes            | 10, 20 or 40 $\mu\text{M}$                 | 24 h pre-treatment                                       | Ischemia-reperfusion                              | $\downarrow$ ROS, Cyt C, cleaved caspase-3, apoptosis $\uparrow$ cell viability, Sirt1, mitochondrial membrane potential, mPTP, Bcl-2 | Guo et al. [187]      |
| Catechin, cyanidin, delphinidin, quercetin                                                                           | H9c2 cardiomyocytes           | 5-50 $\mu\text{M}$                         | 3-day pretreatment, 5 h ischemia, 18 h reperfusion       | Ischemia-reperfusion and Tert-butyl hydroperoxide | $\uparrow$ cell viability                                                                                                             | Akhlaghi & Bandy [64] |
| Myricetin                                                                                                            | Neonatal rat cardiomyocytes   | 20 $\mu\text{M}$                           | 12 h co-treatment                                        | Phenylephrine or $\text{H}_2\text{O}_2$           | $\downarrow$ hypertrophy. MAPK, TAK1, lipid peroxidation $\uparrow$ SOD, Catalase, Nrf2, HO-1                                         | Liao et al. [74]      |
| Cyanidin-3-galactoside, cyanidin-3-glucoside, and cyanidin-3-arabinoside                                             | H9c2 cardiomyocytes           | 10 ng/mL                                   | 24 h pretreatment followed by 2 h $\text{H}_2\text{O}_2$ | $\text{H}_2\text{O}_2$                            | $\downarrow$ apoptosis                                                                                                                | Isaak et al. [65]     |

|                                                                               |                                                                |                                                                                                               |                                                                   |                |                                                                                                                                           |                           |
|-------------------------------------------------------------------------------|----------------------------------------------------------------|---------------------------------------------------------------------------------------------------------------|-------------------------------------------------------------------|----------------|-------------------------------------------------------------------------------------------------------------------------------------------|---------------------------|
| Hesperetin                                                                    | H9c2 cardiomyocytes                                            | 10 $\mu$ M                                                                                                    | 12 h pretreatment, followed by 24 h isoproterenol                 | Isoproterenol  | $\downarrow$ O <sub>2</sub> <sup>-</sup><br>$\uparrow$ Nrf2                                                                               | Velusamy et al. [79]      |
| Chlorogenic acid                                                              | Neonatal rat cardiomyocytes                                    | 10, 50 or 100 $\mu$ M                                                                                         | 2 h pretreatment then 48 h isoproterenol                          | Isoproterenol  | $\downarrow$ hypertrophy, NF- $\kappa$ B activity, ROS                                                                                    | Li et al. [110]           |
| Catechol-O-sulphate, pyrogallol-O-sulphate, and 1-methylpyrogallol-O-sulphate | H9c2 cardiomyocytes and rat cardiomyocytes                     | 12 $\mu$ M catechol-O-sulphate; 6 $\mu$ M pyrogallol-O-sulphate; and 3 $\mu$ M 1-methylpyrogallol-O-sulphate: | 2 h pretreatment followed by 24 and 48 h isoproterenol            | Isoproterenol  | $\downarrow$ ROS, calmodulin-dependent protein kinase II<br>$\uparrow$ cell viability improved beating patterns and Ca <sup>2+</sup> flux | Dias-Pedroso et al. [147] |
| Chlorogenic acid                                                              | Cardiomyocytes from urine human induced pluripotent stem cells | 0.1 $\mu$ mol/L                                                                                               | 12 h pretreatment followed by 24 h TNF- $\alpha$                  | TNF- $\alpha$  | $\downarrow$ apoptosis, cleaved caspase-3, Bax, NF- $\kappa$ B, JNK<br>$\uparrow$ mitochondrial membrane potential, Bcl-2, ERK1/2         | Tian et al. [108]         |
| Genistein                                                                     | Cardiac fibroblasts                                            | 20, 50 and 100 $\mu$ M                                                                                        | 24 h co-treatment                                                 | TGF- $\beta$ 1 | $\downarrow$ collagen $\alpha$ -smooth muscle actin, TAK1, JNK                                                                            | Qin et al. [81]           |
| Gallic acid                                                                   | Neonatal cardiac fibroblast                                    | 100 $\mu$ M                                                                                                   | TGF- $\beta$ 1 for 3 h, gallic acid for 9 h                       | TGF- $\beta$ 1 | $\downarrow$ collagen synthesis                                                                                                           | Jin et al. [101]          |
| Blueberry flavonoids and phenolic acids                                       | Rat cardiomyocytes                                             | 0.65-6.55 $\mu$ g/mL (unspecified treatment concentrations)                                                   | 45 min pretreatment, 24 h norepinephrine                          | Norepinephrine | $\downarrow$ lipid peroxidation, apoptosis, SOD, catalase, calpain<br>Improved contractility                                              | Louis et al. [66]         |
| Resveratrol                                                                   | Rat cardiomyocytes                                             | 15, 30 and 60 $\mu$ mol                                                                                       | 30-min pre-incubation with resveratrol then 24 h norepinephrine   | Norepinephrine | $\downarrow$ hypertrophy                                                                                                                  | Thandapilly et al. [186]  |
| Gallic acid                                                                   | H9c2 cardiomyocytes                                            | 25 $\mu$ M                                                                                                    | 24 h co-treatment                                                 | Angiotensin II | $\downarrow$ calmodulin-dependent protein kinase II, Bax, p53, apoptosis                                                                  | Jin et al. [150]          |
| Gallic acid                                                                   | Neonatal rat cardiomyocytes                                    | 10 $\mu$ M                                                                                                    | 24 h angiotensin II followed by unspecified time with gallic acid | Angiotensin II | $\downarrow$ hypertrophy, MAPK                                                                                                            | Yan et al. [151]          |
| Curcumin                                                                      | Cardiac fibroblasts                                            | 5, 10, and 15 $\mu$ M                                                                                         | 1 h pretreatment followed by 12, 24, and 48 h angiotensin II      | Angiotensin II | $\downarrow$ collagen, TGF- $\beta$ , MMP-2, MMP-9<br>$\uparrow$ Sirt1                                                                    | Xiao et al. [188]         |

|                                  |                               |                             |                                                                    |                        |                                                                                                             |                      |
|----------------------------------|-------------------------------|-----------------------------|--------------------------------------------------------------------|------------------------|-------------------------------------------------------------------------------------------------------------|----------------------|
| Resveratrol                      | H9c2 cardiomyocytes           | 20 $\mu$ M                  | 24 h co-treatment                                                  | Hypoxia                | ↓ apoptosis<br>↑ Sirt1                                                                                      | Chen et al. [184]    |
| Resveratrol                      | Neonatal rat cardiac myocytes | 50 $\mu$ M                  | 24–48 h co-treatment                                               | Hyperglycemia          | ↓ O <sub>2</sub> <sup>-</sup> , Nox subunits,<br>lipid peroxidation<br>↑ cell viability                     | Guo et al. [94]      |
| Secoisolariciresinol diglucoside | H9c2 cardiomyocytes           | 500 $\mu$ M                 | 24 h pretreatment followed by 24 h iron                            | Iron overload          | ↓ hypertrophy, H <sub>2</sub> O <sub>2</sub> , TNF- $\alpha$ ,<br>MMP-2 & -9, Bax caspase 3<br>↑ SOD, Bcl-2 | Puukila et al. [117] |
| Resveratrol                      | H9c2 cardiomyocytes           | 0, 10, 25, 50 or 75 $\mu$ M | Resveratrol pretreatment for 24 h followed by doxorubicin for 24 h | Doxorubicin            | ↓ endoplasmic reticulum stress<br>↑ Sirt1                                                                   | Lou et al. [95]      |
| Ellagic acid                     | Rat cardiomyocytes            | 1–20 $\mu$ M                | 18 h co-treatment                                                  | Doxorubicin or hypoxia | ↓ apoptosis, O <sub>2</sub> <sup>-</sup> , mPTP, Bnip3<br>↑ mitochondrial membrane potential                | Dhingra et al. [139] |

↑ denotes an increase, ↓ denotes a decrease. Abbreviations: Akt, protein kinase B; Bax, Bcl-2-associated X protein; Bcl-2, B-cell lymphoma 2; Bnip3, Bcl-2 19-kD interacting protein 3; Ca<sup>2+</sup>, calcium; Cyt C, cytochrome C; ERK1/2, extracellular signal-regulated kinase; GST1, glutathione S-transferase-1; H<sub>2</sub>O<sub>2</sub>, hydrogen peroxide; HO-1, heme oxygenase 1; JNK, c-Jun N-terminal kinase; MAPK, mitogen-activated protein kinase; MMP, matrix metalloproteinase; mPTP, mitochondrial permeability transition pore; mTOR, mammalian target of rapamycin, Nox, NADPH-oxidase; NF- $\kappa$ B, nuclear factor kappa-light-chain-enhancer of activated B cells; Nrf2, nuclear factor erythroid 2-related factor 2; NQO1, NADPH quinone dehydrogenase 1; O<sub>2</sub><sup>-</sup>, superoxide; PI3K, phosphoinositide 3-kinase; ROS, reactive oxygen species; SERCA2a, sarcoplasmic-endoplasmic reticulum Ca<sup>2+</sup> ATPase; Sirt1, sirtuin 1; SOD, superoxide dismutase; TAK1, transforming growth factor- $\beta$ -activated kinase 1; TGF- $\beta$ , transforming growth factor-beta; TNF- $\alpha$ , tumor necrosis factor-alpha; ULK1, unc-51-like kinase 1.

**Table S2.** Effects of Polyphenols in *ex vivo* and *in vivo* preclinical models of HF.

| Polyphenol(s)                                                                                                                               | Subject             | Dosage           | Duration                                                                                                    | Insult                                    | Findings                                                                                                                                           | Author                 |
|---------------------------------------------------------------------------------------------------------------------------------------------|---------------------|------------------|-------------------------------------------------------------------------------------------------------------|-------------------------------------------|----------------------------------------------------------------------------------------------------------------------------------------------------|------------------------|
| Anthocyanin rich corn containing: cyanidin-glucoside, cyanidin-malonylglucoside, pelargonidin-malonylglucoside, cyanidin-dimalonylglucoside | Wistar rats         | 20% of diet      | 8-week pretreatment                                                                                         | <i>Ex vivo</i> ischemia-reperfusion       | ↓ infarct size<br>↑ antioxidant capacity                                                                                                           | Toufeksian et al. [86] |
| Luteolin                                                                                                                                    | Sprague-Dawley rats | 40 μmol/L        | 30-minute pretreatment                                                                                      | <i>Ex vivo</i> ischemia-reperfusion       | ↓ cardiac function, infarct size                                                                                                                   | Fang et al. [88]       |
| Vanillic acid                                                                                                                               | Sprague-Dawley rats | 5 and 10 mg/kg   | 10-day pretreatment                                                                                         | <i>Ex vivo</i> ischemia-reperfusion       | ↓ lipid peroxidation<br>↑ SOD, catalase, GPx, antioxidant capacity                                                                                 | Dianat et al [100]     |
| Cyanidin-3-glucoside, delphinidin-3-glucoside, pelargonidin-3-glucoside                                                                     | Wistar rats         | 20 μM            | 15 min perfusion with anthocyanins prior to ischemia                                                        | <i>Ex vivo</i> ischemia in isolated heart | ↓ caspase-3 activity<br>↑ mitochondrial respiration, cytochrome c reduction                                                                        | Skemiene et al. [132]  |
| Cyanidin-3-glucoside, delphinidin-3-glucoside, pelargonidin-3-glucoside                                                                     | Wistar rats         | 10, 20 or 40 μM  | 15 min perfusion with anthocyanins prior to ischemia                                                        | <i>Ex vivo</i> ischemia in isolated heart | ↑ mitochondrial respiration, ATP production                                                                                                        | Skemiene et al. [133]  |
| Luteolin                                                                                                                                    | Sprague-Dawley rats | 200 mg/kg/d      | 2-week pretreatment                                                                                         | Ischemia-reperfusion                      | ↓ infarct size, Bax, cleaved caspase 3<br>↑ Bcl-2, SERCA2a, Akt                                                                                    | Nai et al. [90]        |
| Daidzein                                                                                                                                    | Sprague-Dawley rats | 5 or 10 mg/kg/d  | 1 h pretreatment                                                                                            | Ischemia-reperfusion                      | ↓ NF-κB, plasma IL-6 and TNF-α, caspase-3 activity<br>↑ cardiac function, catalase                                                                 | Kim et al. [82]        |
| Genistein                                                                                                                                   | Rabbits             | 1 mg/kg          | 5 min pretreatment                                                                                          | Ischemia-reperfusion                      | ↓ infarct size, apoptosis, Bax                                                                                                                     | Ji et al [83]          |
| (-)-epicatechin                                                                                                                             | Sprague-Dawley rats | 1 mg/kg/d        | 2- or 10-day pretreatment followed by ischemia-reperfusion with 2 or 21 days before sacrifice, respectively | Ischemia-reperfusion                      | ↓ hypertrophy, infarct area, lipid peroxidation, MMP-9 and MMP-2<br>↑ Antioxidant capacity                                                         | Yamazaki et al. [87]   |
| Chlorogenic acid                                                                                                                            | Aged SAMP8 mice     | 10 or 20 mg/kg/d | 2-week pretreatment                                                                                         | Ischemia-reperfusion                      | ↓ IL-1β, TNF-α, infarct size, mitochondrial ROS, JNK, SOD2, cytochrome C<br>↑ SOD, GPx, oxygen consumption                                         | Li et al. [134]        |
| Naringenin                                                                                                                                  | Sprague-Dawley rats | 50 mg/kg/d       | 5-day pretreatment                                                                                          | Ischemia-reperfusion                      | ↓ infarct size, apoptosis, cleaved caspase 3, O <sub>2</sub> <sup>-</sup> , lipid peroxidation, Nox subunit,<br>↑ cardiac function, catalase, SOD2 | Yu et al. [78]         |

|                                  |                     |                                          |                                                                                       |                                                         |                                                                                                                             |                         |
|----------------------------------|---------------------|------------------------------------------|---------------------------------------------------------------------------------------|---------------------------------------------------------|-----------------------------------------------------------------------------------------------------------------------------|-------------------------|
| Urolithin A                      | C57BL/6 mice        | 1 mg/kg                                  | 24 h pretreatment                                                                     | Ischemic reperfusion                                    | ↓ apoptosis<br>↑ FS, SOD                                                                                                    | Tang et al. [172]       |
| Urolithin B                      | Sprague-Dawley rats | 0.7 mg/kg/d                              | 2-day pretreatment                                                                    | Ischemia-reperfusion                                    | ↓ infarct size,<br>cleaved caspase-3, apoptosis<br>↑ cardiac function, mTOR,<br>ULK1, O <sub>2</sub> <sup>-</sup> , SOD     | Zheng et al. [106]      |
| Secoisolariciresinol diglucoside | Sprague-Dawley rats | 20mg/kg/d                                | 8 weeks high-cholesterol diet followed by 2 weeks of secoisolariciresinol diglucoside | Ischemic reperfusion in hypercholesterolemic myocardium | ↓ infarct size<br>↑ HO-1, EF, FS                                                                                            | Penumathsa et al. [114] |
| Apigenin                         | Wistar rats         | 10, 20 or 40 mg/kg                       | 24 h pretreatment                                                                     | Coronary artery ligation                                | ↓ infarct size, MMP-9, TNF- $\alpha$ , IL-1 $\beta$ , IL-6, NF- $\kappa$ B, caspase 3                                       | Du et al. [75]          |
| Hesperetin                       | C57BL/6 mice        | 30 mg/kg/d                               | 8-week treatment following surgery                                                    | Coronary artery ligation                                | ↓ fibrosis, TNF- $\alpha$ , IL-1 $\beta$ and IL-6, NF- $\kappa$ B<br>↑ EF                                                   | Wang et al. [80]        |
| Chlorogenic acid                 | C57BL/6 mice        | 30 mg/kg/d                               | 7- or 14-day treatment following surgery                                              | Coronary artery ligation                                | ↓ hypertrophy, infarct size<br>↑ FS                                                                                         | Kanno et al. [109]      |
| Curcumin                         | C57BL/6J mice       | 100 mg/kg/d                              | 1-week pretreatment followed by 4 weeks post-surgery                                  | Coronary artery ligation                                | ↓ fibrosis, collagen, TGF- $\beta$ , infarct size<br>↑ Sirt1                                                                | Xiao et al. [188]       |
| Delphinidin                      | C57BL/6J mice       | 5 or 15 mg/kg/d                          | 8-week treatment following surgery                                                    | Transverse aortic constriction                          | ↓ hypertrophy, fibrosis O <sub>2</sub> <sup>-</sup> , Nox activity<br>↑ EF                                                  | Chen et al. [68]        |
| Myricetin                        | C57BL/6J mice       | 200 mg/kg/d                              | 6-week treatment following surgery                                                    | Transverse aortic constriction                          | ↓ hypertrophy, Fibrosis, MAPK, NF- $\kappa$ B, TAK1<br>↑ EF, FS, Nrf2, HO-1                                                 | Liao et al. [74]        |
| Genistein                        | Kunming mice        | 10, 50 and 100 mg/kg/d                   | 8-week treatment following surgery                                                    | Transverse aortic constriction                          | ↓ hypertrophy, fibrosis<br>↑ EF, FS                                                                                         | Qin et al. [81]         |
| Gallic acid                      | CD-1 mice           | 100 mg/kg/day                            | 2-week treatment following HF induction                                               | Transverse aortic constriction                          | ↓ hypertrophy, fibrosis, collagen synthesis<br>↑ FS                                                                         | Jin et al. [101]        |
| Chlorogenic acid                 | C57BL/6N mice       | 110 mg/kg/d                              | 4-week treatment following surgery                                                    | Transverse aortic constriction                          | ↓ TNF- $\alpha$<br>↑ EF, FS,                                                                                                | Tian et al. [108]       |
| Gallic acid                      | C57BL/6 mice        | 5 or 20 mg/kg/d                          | 8-week treatment following surgery                                                    | Transverse aortic constriction                          | ↓ hypertrophy, fibrosis, collagen synthesis, MAPK, IL-6, IL-1 $\beta$ , O <sub>2</sub> <sup>-</sup> , Akt<br>↑ FS, EF, ULK1 | Yan et al. [151]        |
| Epigallocatechin-3 gallate       | Sprague Dawley rats | 0.02%, 0.04% and 0.08% in drinking water | 3- or 8-week treatment following surgery                                              | Abdominal aortic constriction                           | ↓ hypertrophy, fibrosis<br>↑ cardiac function                                                                               | Hao et al. [85]         |

|                                                                                      |                                                                        |                  |                                                                     |                                               |                                                                                                               |                          |
|--------------------------------------------------------------------------------------|------------------------------------------------------------------------|------------------|---------------------------------------------------------------------|-----------------------------------------------|---------------------------------------------------------------------------------------------------------------|--------------------------|
| Luteolin                                                                             | Sprague-Dawley rats                                                    | 10 µg/kg/d       | 2-week treatment following surgery                                  | Abdominal aortic constriction                 | ↓ fibrosis, Bax, cleaved caspase 3<br>↑ EF, FS, Bcl-2                                                         | Hu et al. [89]           |
| Hesperetin                                                                           | C57BL/6 mice                                                           | 30 mg/kg/d       | 7-week treatment 1 week after surgery                               | Aortic banding                                | ↓ hypertrophy, JNK, fibrosis, TGF-β1, Nox subunits, apoptosis, Bax, cleaved caspase 3<br>↑ EF, FS, SOD1, SOD2 | Deng et al. [76]         |
| Hesperetin                                                                           | Wistar rats                                                            | Not provided     | 30-day pretreatment followed by 7 days isoproterenol                | Isoproterenol                                 | ↓ hypertrophy, fibrosis, lipid peroxidation, KEAP1<br>↑ antioxidant capacity, NQO1, HO-1, Nrf2                | Velusamy et al. [79]     |
| Ellagic Acid                                                                         | Wistar Rats                                                            | 7.5 & 15 mg/kg/d | 10-day pretreatment followed by 2 days isoproterenol injections     | Isoproterenol                                 | ↓ tachycardia, hypertrophy, lipid peroxidation, infarct size                                                  | Kannan & Quine [104]     |
| Gallic acid                                                                          | Wistar and spontaneously hypertensive rats                             | 1% in tap water  | 4-month co-treatment                                                | Hypertension                                  | ↓ blood pressure, hypertrophy, calmodulin-dependent protein kinase II, cleaved caspase-3, Bax, p53            | Jin et al. [150]         |
| Resveratrol                                                                          | double transgenic rats harboring human renin and angiotensinogen genes | 800 mg/kg/d      | 4-week treatment                                                    | RAAS-induced cardiac remodeling               | ↓ hypertrophy<br>↑ survival, Sirt1                                                                            | Biala et al. [91]        |
| Resveratrol                                                                          | Sprague-Dawley rats                                                    | 2.5 mg/kg/d      | 2 days post-surgery for 26 days or 14 days post-surgery for 14 days | Volume or pressure overload                   | ↑ cardiac function in pressure overload only                                                                  | Wojciechowski et al [92] |
| Purple rice extract containing 73% cyanidin-3-glucoside                              | Wistar rats                                                            | 250 mg/kg/d      | 4-week treatment following streptozotocin injection                 | Streptozotocin                                | ↓ fibrosis, NF-κB, MMP-9, MAPK, TGF-β                                                                         | Chen et al. [84]         |
| Urolithin A and B                                                                    | Wistar rats                                                            | 2.5 mg/kg/d      | 3-week treatment following streptozotocin injection.                | Streptozotocin                                | ↑ cardiac function, SERCA2a Improved Ca <sup>2+</sup> flux.                                                   | Savi et al. [149]        |
| Anthocyanin rich black rice anthocyanin extract containing ~73% cyanidin-3-glucoside | Wistar rats                                                            | 250 mg/kg/d      | 4-week treatment following streptozotocin injection                 | Streptozotocin                                | ↓ apoptosis, cleaved caspase 3<br>↑ Akt, Bcl-xL, Bcl-2, FS                                                    | Liu et al. [171]         |
| Secoisolariciresinol diglucoside                                                     | Wistar rats                                                            | 25 mg/kg/d       | 14-day pretreatment + 21-day treatment with secoisolariciresinol    | Monocrotaline-induced right heart dysfunction | ↓ hypertrophy, H <sub>2</sub> O <sub>2</sub> , lipid peroxidation, catalase, SOD, GPx                         | Puukila et al. [116]     |

|  |  |  |                                                                                                      |  |                    |  |
|--|--|--|------------------------------------------------------------------------------------------------------|--|--------------------|--|
|  |  |  | diglucoside following monocrotaline injection, or 21-day treatment following monocrotaline injection |  | ↑ cardiac function |  |
|--|--|--|------------------------------------------------------------------------------------------------------|--|--------------------|--|

↑ denotes an increase, ↓ denotes a decrease. Abbreviations: Akt, protein kinase B; Bax, Bcl-2-associated X protein; Bcl-2, Bcl-xL, B-cell lymphoma 2; B-cell lymphoma-extra-large; Ca<sup>2+</sup>, calcium; Cyt C, cytochrome C; ERK1/2, extracellular receptor kinase; EF, ejection fraction; FS, fractional shortening; GPx, Glutathione peroxidase; H<sub>2</sub>O<sub>2</sub>, hydrogen peroxide; HO-1, heme oxygenase 1; IL, interleukin; JNK, c-Jun N-terminal kinase; KEAP1, kelch-like ECH-associated protein 1; MAPK, mitogen-activated protein kinase; MMP, matrix metalloproteinase; mTOR, mammalian target of rapamycin; NF-κB, nuclear factor kappa-light-chain-enhancer of activated B cells; Nox, NADPH-oxidase; Nrf2, nuclear factor erythroid 2-related factor 2; NQO1, NADPH quinone dehydrogenase 1; O<sub>2</sub><sup>-</sup>, superoxide; ROS, reactive oxygen species; SERCA2a, sarcoplasmic-endoplasmic reticulum Ca<sup>2+</sup> ATPase; Sirt1, sirtuin 1; SOD, superoxide dismutase; TAK1, transforming growth factor beta-activated kinase 1; TGF-β, transforming growth factor-beta; TNF-α, tumor necrosis factor-alpha; ULK1, unc-51-like kinase 1.
